# Supplementary material for: Sharpening up tumor microenvironment to enhance the efficacy of immune checkpoint blockade on head and neck cancer using a CpG-oligodeoxynucleotide
Source: Springer Nature journal article supplement (doi:10.1007/s00262-021-03062-8), 2021-09-28
Supplement: MOESM1 [file 19705806]

## Supplementary Material

### **Sharpening up tumor microenvironment to enhance the efficacy of immune checkpoint blockade on head and neck cancer using a CpG-oligodeoxynucleotide**

Jen-Chih Tseng<sup>1</sup> · Jing-Xing Yang<sup>1</sup> · Yi-Ling Liu<sup>1</sup> · Yu-Wen Su<sup>1</sup> · Alan Yueh-Luen Lee<sup>2</sup> · Ya-Wen Chen<sup>2</sup> · Ko-Jiunn Liu<sup>2</sup> · Yunping Luo<sup>3</sup> · Yi-Ren Hong<sup>4</sup> · Tsung-Hsien Chuang<sup>1,5</sup>

<sup>1</sup>Immunology Research Center, National Health Research Institutes, Zhunan, Miaoli 35053, Taiwan.

<sup>2</sup>National Institute of Cancer Research, National Health Research Institutes, Zhunan, Miaoli 35053, Taiwan.

<sup>3</sup>Department of Immunology, Institute of Basic Medical Sciences, Chinese Academy of Medical Sciences; School of Basic Medicine, Peking Union Medical College, Beijing, 100005, China.

<sup>4</sup>Graduate Institute of Medicine, College of Medicine, Kaohsiung Medical University, Kaohsiung 80708, Taiwan.

<sup>5</sup>Program in Environmental and Occupational Medicine, Kaohsiung Medical University, Kaohsiung 80708, Taiwan.

**Supplementary table 1** PCR primers for human genes

|                    |                         |
|--------------------|-------------------------|
| $\beta$ -Actin For | CTCTTCCAGCCTTCCTTCCT    |
| $\beta$ -Actin Rev | TGTTGGCGTACAGGTCTTTG    |
| GAPDH For          | GAAGGTGAAGGTCGGAGTCA    |
| GAPDH Rev          | AATGAAGGGGTCATTGATGG    |
| IL-1 $\beta$ For   | GGACAAGCTGAGGAAGATGC    |
| IL-1 $\beta$ Rev   | TCGTTATCCCATGTGTCGAA    |
| IL-6 For           | AGACAGCCACTCACCTCTTCAG  |
| IL-6 Rev           | TTCTGCCAGTGCCTCTTTGCTG  |
| IL-12A For         | TGCCTTCACCACTCCCAAACC   |
| IL-12A Rev         | CAATCTCTTCAGAAGTGCAAGGG |
| IL-12B For         | GACATTCTGCGTTCAGGTCCAG  |
| IL-12B Rev         | CATTTTTGCGGCAGATGACCGTG |
| TNF $\alpha$ For   | AACCTCCTCTCTGCCATCAA    |
| TNF $\alpha$ Rev   | GGAAGACCCCTCCCAGATAG    |
| IFN $\alpha$ 2 For | TGGGCTGTGATCTGCCTCAAAC  |
| IFN $\alpha$ 2 Rev | CAGCCTTTTGGAAGTGGTTGCC  |
| IFN $\beta$ For    | TGGGAGGATTCTGCATTACC    |
| IFN $\beta$ Rev    | CAGCATCTGCTGGTTGAAGA    |
| IFN $\gamma$ For   | TTCAGCTCTGCATCGTTTTG    |
| IFN $\gamma$ Rev   | TCTTTTGGATGCTCTGGTCA    |

**Supplementary table 2** PCR Primers for mouse genes

| Gene               | Sequence                |
|--------------------|-------------------------|
| $\beta$ -Actin For | GCTACAGCTTCACCACCACA    |
| $\beta$ -Actin Rev | AAGGAAGGCTGGAAAAGAGC    |
| GAPDH For          | AGAACATCATCCCTGCATCC    |
| GAPDH Rev          | CACATTGGGGGTAGGAACAC    |
| IL-1 $\beta$ For   | AGAGCTTCAGGCAGGCAGTA    |
| IL-1 $\beta$ Rev   | AGGTGCTCATGTCCTCATCC    |
| IL-6 For           | CCGGAGAGGAGACTTCACAG    |
| IL-6 Rev           | TTCCACGATTTCCAGAGA      |
| IL-12A For         | ACGGCCAGAGAAAACTGAA     |
| IL-12A Rev         | CTACCAAGGCACAGGGTCAT    |
| IL-12B For         | CACGCCTGAAGAAGATGACA    |
| IL-12B Rev         | AGTCCCTTTGGTCCAGTGTG    |
| TNF $\alpha$ For   | ACGGCATGGATCTCAAAGAC    |
| TNF $\alpha$ Rev   | GTGGGTGAGGAGCACGTAG     |
| IFN $\alpha$ 2 For | ATCCAGAAGGCTCAAGCCATCC  |
| IFN $\alpha$ 2 Rev | GGAGGGTTGTATTCCAAGCAGC  |
| IFN $\beta$ For    | GCCTTTGCCATCCAAGAGATGC  |
| IFN $\beta$ Rev    | ACACTGTCTGCTGGTGGAGTTC  |
| IFN $\gamma$ For   | CAGCAACAGCAAGGCGAAAAAGG |
| IFN $\gamma$ Rev   | TTCCGCTTCCTGAGGCTGGAT   |
| CD3 For            | CTGCTACACACCAGCCTCAA    |
| CD3 Rev            | GCCTTGGCCTTCCTATTCTT    |
| CD4 For            | CTGATGTGGAAGGCAGAGAAG   |
| CD4 Rev            | GAGACCTGGGGTATCTTGAGG   |
| CD8 For            | TATGGCTTCATCCCACAACA    |
| CD8 Rev            | GACTGGCACGACAGAACTGA    |
| CD45 For           | TCAGCAAGTTTCCCATCAAAG   |
| CD45 Rev           | CCCTTGTGCAGCAATGTATTT   |
| CD20 For           | GTCTTCGCACCCATCTGTTT    |
| CD20 Rev           | AATGGCAGCAAAGAGGCTTA    |
| CD86 For           | TCAGTGATCGCCAACTTCAG    |
| CD86 Rev           | TTAGGTTTCGGGTGACCTTG    |
| F4/80 For          | CTCTGTGGTCCCACCTTCAT    |
| F4/80 Rev          | GATGGCCAAGGATCTGAAAA    |
| CCR7 For           | AACGGGCTGGTGATACTGAC    |
| CCR7 Rev           | TAGGCCCAGAAGGGAAGAAT    |
| CD206 For          | TTTGAGTGGAGTGATGGAACC   |
| CD206 Rev          | ACAGCATGGCTTTGTGATACC   |

|           |                       |
|-----------|-----------------------|
| iNOS For  | CACCTTGGAGTTCACCCAGT  |
| iNOS Rev  | ACCACTCGTACTTGGGATGC  |
| ARG1 For  | ACAGGGCTCCTTTCAGGACTA |
| ARG1 Rev  | AGTCAGTCCCTGGCTTATGGT |
| BST2 For  | CAATCTACTTCGCCGTCACA  |
| BST2 Rev  | TCTTCTCCAGGGACTCCTGA  |
| NKp46 For | ACTGTGCCTTGGGCTATGTC  |
| NKp46 Rev | CTCGATGGCTTTGGTCTCTC  |
| TLR9 For  | TTCTCTTCATGGACGGGAAC  |
| TLR9 Rev  | GGCACCTTTGTGAGGTTGTT  |

Supplementary figure 1

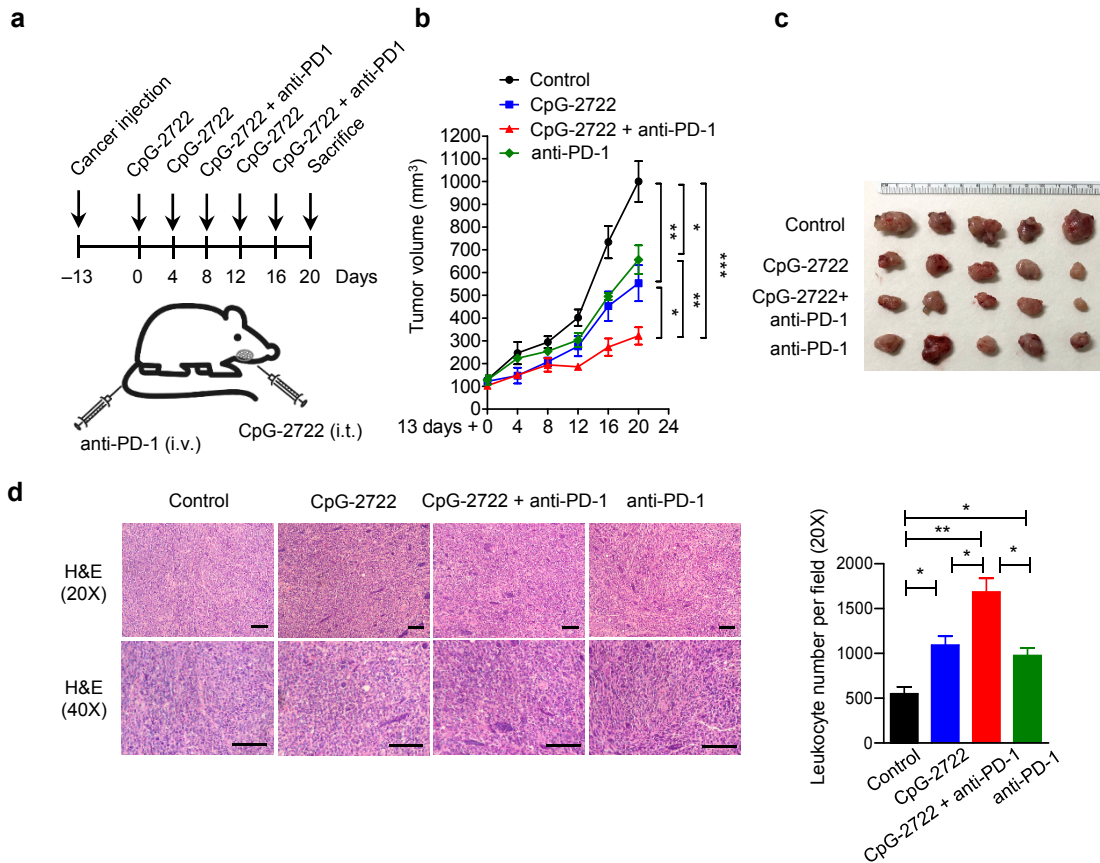

**Supplementary Fig. 1** CpG-2722 augments suppressive effect of intravenous injected immune checkpoint inhibitor on growth of head and neck squamous cell carcinomas. **a** C57BL/6J mice were orthotopically injected with  $2 \times 10^6$  NHRI-HN1 cells to grow HNSCC. Thirteen days later, when the tumors reached approx.  $100 \text{ mm}^3$ , the mice were intratumorally injected with the control vehicle or  $50 \mu\text{g}$  CpG-2722 every four days in combination with or without the intravenous injection of  $10 \mu\text{g}$  anti-PD-1 antibody every eight days as illustrated. **b** Tumor sizes were measured (each group contained five mice and five tumors). **c** Endpoint of the tumor growths are represented as indicated. **d** Tumor samples were visualized by H&E staining (left upper panel). Scale bar represents  $100 \mu\text{m}$ . Leukocyte infiltrations in the 20x magnification areas were counted by using Image J software (Right panel). Data represent mean  $\pm$  SEM. Asterisk \*, \*\*, and \*\*\* represent the statistically significant difference  $p < 0.05$ ,  $p < 0.01$ , and  $p < 0.001$ , respectively, compared to the control.
